# Supplementary material for: Onset of blast crisis in chronic myeloid leukemia patients in treatment-free remission
Source: PubMed Central journal article supplement — Haematologica. 2022 Aug 4;107(12):2944–9. doi: 10.3324/haematol.2022.280740 (PMC9713569; doi:10.3324/haematol.2022.280740), 2022-08-04
Supplement: 2022_280740_DULUCQ_SUPPL.pdf [file 2022_280740_DULUCQ_SUPPL.pdf]

# Onset of blast crisis in chronic myeloid leukemia patients in treatment-free remission

Stephanie Dulucq,<sup>1,2,3</sup> Sandrine Hayette,<sup>2,3,4</sup> Jean-Michel Cayuela,<sup>2,3,5</sup> Frédéric Bauduer,<sup>2,6</sup> Kaddour Chabane,<sup>4</sup> Patrice Chevallier,<sup>7</sup> Pascale Cony-Makhoul,<sup>2,8</sup> Pascale Flandrin-Gresta,<sup>2,3,9</sup> Caroline Le Jeune,<sup>2,10</sup> Yannick Le Bris,<sup>3,11</sup> Laurence Legros,<sup>2,12</sup> Hervé Maisonneuve,<sup>13</sup> Lydia Roy,<sup>2,14</sup> Francois-Xavier Mahon,<sup>3,15</sup> Ivan Sloma,<sup>2,3,16</sup> Delphine Rea<sup>2,17</sup> and Franck Emmanuel Nicolini<sup>2,18</sup>

<sup>1</sup>Laboratory of Hematology, University Hospital of Bordeaux, Pessac; <sup>2</sup>Groupe Fi-LMC, Centre Léon Bérard, Lyon; <sup>3</sup>Groupe GBMHM, Hôpital Saint Louis, Paris; <sup>4</sup>Laboratory of Hematology, Centre Hospitalier Lyon Sud, Pierre-Bénite; <sup>5</sup>Laboratory of Hematology, Hôpital Saint Louis, Paris; <sup>6</sup>Department of Hematology, Côte Basque Hospital, Bayonne; <sup>7</sup>Department of Hematology, Hôtel Dieu, Nantes; <sup>8</sup>Department of Hematology, Annecy-Genevois Hospital, Pringy; <sup>9</sup>Laboratory of Hematology, University Hospital of Saint-Etienne, Saint Etienne; <sup>10</sup>Department of Hematology, Institut de Cancérologie Lucien Neuwirth, Saint Etienne; <sup>11</sup>Laboratory of Hematology, Hôtel Dieu, Nantes; <sup>12</sup>Department of Hematology, Hôpital Paul Brousse, Villejuif; <sup>13</sup>Department of Hematology and Oncology, La Roche sur Yon Hospital, La Roche sur Yon; <sup>14</sup>Department of Hematology, Hôpital Henri Mondor, Créteil; <sup>15</sup>Cancer Center of Bordeaux, Institut Bergonié, Bordeaux; <sup>16</sup>Laboratory of Hematology, Hôpital Henri Mondor, Créteil; <sup>17</sup>Department of Hematology, Hôpital Saint Louis, Paris and <sup>18</sup>Department of Hematology and CRCL, INSERM U1052, Centre Léon Bérard, Lyon, France

Correspondence:

F.E. NICOLINI - franck-emmanuel.nicolini@lyon.unicancer.fr

<https://doi.org/10.3324/haematol.2022.280740>

Table S1 Myeloid panel.

| No. | Gene              | Reference      |
|-----|-------------------|----------------|
| 1   | <i>ASXL1</i>      | NM_015338.5    |
| 2   | <i>ASXL2</i>      | NM_018263.4    |
| 3   | <i>BCOR</i>       | NM_001123385.1 |
| 4   | <i>BCORL1</i>     | NM_001184772.2 |
| 5   | <i>BRAF</i>       | NM_004333.4    |
| 6   | <i>CALR</i>       | NM_004343.3    |
| 7   | <i>CBL</i>        | NM_005188.3    |
| 8   | <i>CEBPA</i>      | NM_004364.4    |
| 9   | <i>CREBBP</i>     | NM_004380.2    |
| 10  | <i>CSF3R</i>      | NM_004364.4    |
| 11  | <i>CSNK1A1</i>    | NM_001025105.2 |
| 12  | <i>DNMT3A</i>     | NM_175629.2    |
| 13  | <i>EP300</i>      | NM_001429.3    |
| 14  | <i>ETNK1</i>      | NM_018638.4    |
| 15  | <i>ETV6</i>       | NM_001987.4    |
| 16  | <i>EZH2</i>       | NM_004456.4    |
| 17  | <i>FLT3</i>       | NM_004119.2    |
| 18  | <i>GATA2</i>      | NM_001145661.1 |
| 19  | <i>HRAS</i>       | NM_005343.2    |
| 20  | <i>IDH1</i>       | NM_005896.3    |
| 21  | <i>IDH2</i>       | NM_002168.3    |
| 22  | <i>JAK2</i>       | NM_004972.3    |
| 23  | <i>KIT</i>        | NM_000222.2    |
| 24  | <i>KDM6A</i>      | NM_001291415.1 |
| 25  | <i>KMT2A/MLL</i>  | NM_001197104.1 |
| 26  | <i>KMT2D/MLL2</i> | NM_003482.3    |
| 27  | <i>KRAS</i>       | NM_033360.3    |
| 28  | <i>MECOM</i>      | NM_005373.2    |
| 29  | <i>MPL</i>        | NM_005373.2    |
| 30  | <i>MYC</i>        | NM_002467.4    |
| 31  | <i>NPM1</i>       | NM_002520.6    |
| 32  | <i>NRAS</i>       | NM_002524.4    |
| 33  | <i>PHF6</i>       | NM_001015877.1 |
| 34  | <i>PTEN</i>       | NM_000314.6    |
| 35  | <i>PTPN11</i>     | NM_002834.3    |
| 36  | <i>RAD21</i>      | NM_006265.2    |
| 37  | <i>RUNX1</i>      | NM_001754.4    |
| 38  | <i>SETBP1</i>     | NM_015559.2    |
| 39  | <i>SF3B1</i>      | NM_012433.2    |
| 40  | <i>SMC1A</i>      | NM_006306.3    |
| 41  | <i>SMC3</i>       | NM_005445.3    |
| 42  | <i>SRSF2</i>      | NM_001195427.1 |
| 43  | <i>STAG2</i>      | NM_001042749.2 |
| 44  | <i>TET2</i>       | NM_001127208.2 |
| 45  | <i>TP53</i>       | NM_000546.5    |
| 46  | <i>U2AF1</i>      | NM_006758.2    |
| 47  | <i>WT1</i>        | NM_024426.4    |
| 48  | <i>ZRSR2</i>      | NM_005089.3    |

Table S2 Lymphoid panel.

| No | Gene             | Reference      |
|----|------------------|----------------|
| 1  | <i>ABL1</i>      | NM_005157.5    |
| 2  | <i>ARID1A</i>    | NM_006015.5    |
| 3  | <i>ATM</i>       | NM_000051.3    |
| 4  | <i>ATP6AP1</i>   | NM_001183.5    |
| 5  | <i>ATP6V1B2</i>  | NM_001693.3    |
| 6  | <i>B2M</i>       | NM_004048.2    |
| 7  | <i>BCL2</i>      | NM_000633.2    |
| 8  | <i>BCL6</i>      | NM_001130845.1 |
| 9  | <i>BIRC3</i>     | NM_182962.2    |
| 10 | <i>BTK</i>       | NM_000061.2    |
| 11 | <i>CARD11</i>    | NM_001324281.1 |
| 12 | <i>CCND1</i>     | NM_053056.2    |
| 13 | <i>CCND3</i>     | NM_001760.4    |
| 14 | <i>CD58</i>      | NM_001779.2    |
| 15 | <i>CD79A</i>     | NM_001783.3    |
| 16 | <i>CD79B</i>     | NM_000626.3    |
| 17 | <i>CDKN2A</i>    | NM_058195.2    |
| 18 | <i>CDKN2B</i>    | NM_004936.4    |
| 19 | <i>CIITA</i>     | NM_001286402.1 |
| 20 | <i>CRBN</i>      | NM_016302.2    |
| 21 | <i>CXCR4</i>     | NM_003467.2    |
| 22 | <i>DNMT3B</i>    | NM_006892.3    |
| 23 | <i>FBXW7</i>     | NM_033632.3    |
| 24 | <i>FOXO1</i>     | NM_002015.3    |
| 25 | <i>GNA13</i>     | NM_006572.5    |
| 26 | <i>ID3</i>       | NM_002167.4    |
| 27 | <i>IKZF1</i>     | NM_006060.5    |
| 28 | <i>IRF4</i>      | NM_002460.3    |
| 29 | <i>KLF2</i>      | NM_016270.3    |
| 30 | <i>LYN</i>       | NM_002350.3    |
| 31 | <i>MAP2K1</i>    | NM_002755.3    |
| 32 | <i>MAU2</i>      | NM_015329.3    |
| 33 | <i>MEF2B</i>     | NM_001145785.1 |
| 34 | <i>MYD88</i>     | NM_002468.4    |
| 35 | <i>NFKBIE</i>    | NM_004556.2    |
| 36 | <i>NOTCH1</i>    | NM_017617.3    |
| 37 | <i>NOTCH2</i>    | NM_024408.3    |
| 38 | <i>PAX5</i>      | NM_016734.2    |
| 39 | <i>PDGFRB</i>    | NM_002609.3    |
| 40 | <i>PIM1</i>      | NM_001243186.1 |
| 41 | <i>PLCG2</i>     | NM_002661.4    |
| 42 | <i>PRDM1</i>     | NM_001198.3    |
| 43 | <i>PTPRD</i>     | NM_002839.3    |
| 44 | <i>RHOA</i>      | NM_001313941.1 |
| 45 | <i>RRAGC</i>     | NM_022157.3    |
| 46 | <i>SETD2</i>     | NM_014159.6    |
| 47 | <i>SH2B3/LNK</i> | NM_005475.2    |
| 48 | <i>SMO</i>       | NM_005631.5    |

Table S2 (Lymphoid panel, continued)

| No | Gene                         | Reference      |
|----|------------------------------|----------------|
| 49 | <i>SOCS1</i>                 | NM_003745.1    |
| 50 | <i>STAG1</i>                 | NM_005862.2    |
| 51 | <i>STAT3</i>                 | NM_139276.2    |
| 52 | <i>STAT5B E8, E16 et E17</i> | NM_012448.3    |
| 53 | <i>STAT6</i>                 | NM_001178078.1 |
| 54 | <i>SUZ12</i>                 | NM_015355.3    |
| 55 | <i>SYK</i>                   | NM_001174167.2 |
| 56 | <i>TCF3</i>                  | NM_003200.4    |
| 57 | <i>TNFAIP3</i>               | NM_006290.3    |
| 58 | <i>TNFRSF14</i>              | NM_003820.3    |
| 59 | <i>TRAF2</i>                 | NM_021138.3    |
| 60 | <i>TRAF3</i>                 | NM_145725.2    |
| 61 | <i>XBP1</i>                  | NM_001079539.1 |
| 62 | <i>XPO1</i>                  | NM_003400.3    |
